# Supplementary material
Source: publisher figshare collection journal article supplement (https://acs.figshare.com/ndownloader/files/17468984)
Supplement: Supplementary file 1 [file 17468984]

## *Supporting Information*

# **Enhanced Quantum Efficiency in Vertical Mixed-thickness $n$ -ReS<sub>2</sub>/p-Si Heterojunction Photodiodes**

Bablu Mukherjee, <sup>\*,†</sup> Amir Zulkefli, <sup>†,‡</sup> Ryoma Hayakawa, <sup>†</sup> Yutaka Wakayama, <sup>†,‡</sup> and Shu Nakaharai<sup>\*,†</sup>

<sup>†</sup> International Center for Materials Nanoarchitectonics (WPI-MANA), National Institute for Materials Science (NIMS), 1-1 Namiki, Tsukuba 305-0044, Japan

<sup>‡</sup> Department of Chemistry and Biochemistry, Faculty of Engineering, Kyushu University, 1-1 Namiki, Tsukuba 305-0044, Japan

\*Email: [MUKHERJEE.Bablu@nims.go.jp](mailto:MUKHERJEE.Bablu@nims.go.jp) (B.M.), [NAKAHARAI.Shu@nims.go.jp](mailto:NAKAHARAI.Shu@nims.go.jp) (S.N.)

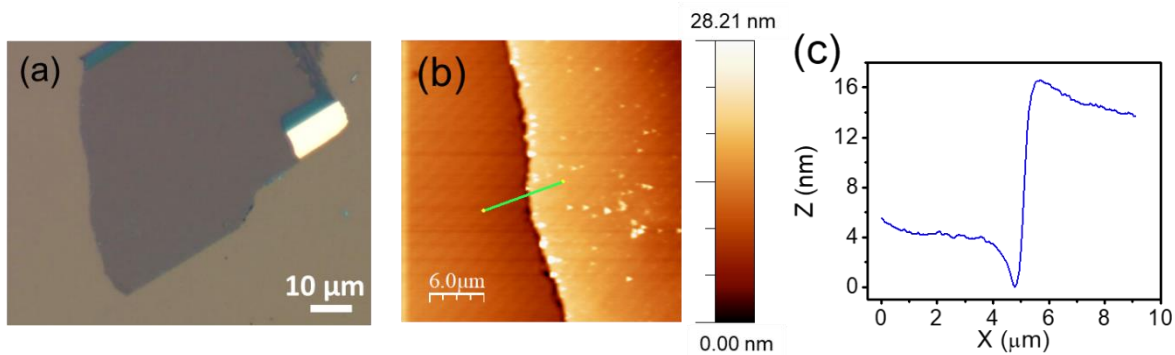

**Figure S1.** (a) Optical image and (b) surface topography AFM image of the large-area ReS<sub>2</sub> film fabricated using an Au-mediated technique. (c) The line profile of the thickness across the line shown in (b).

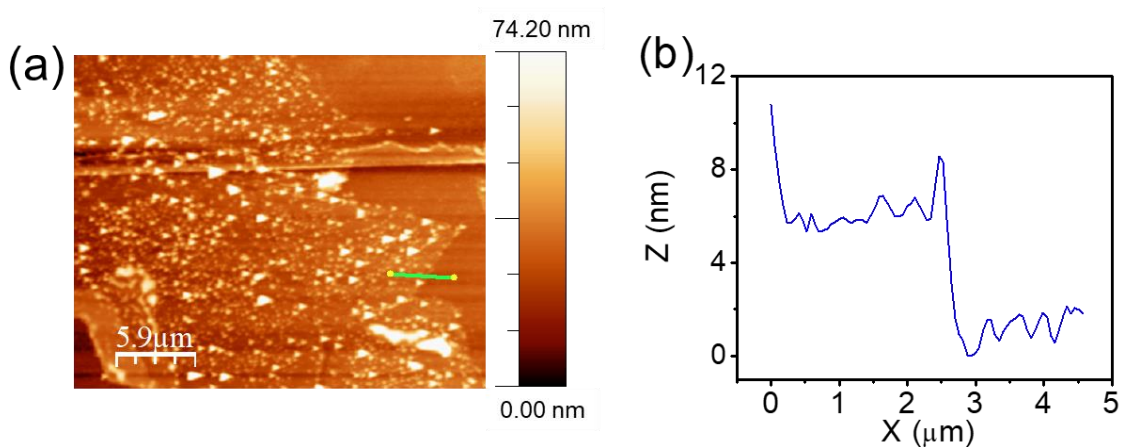

**Figure S2.** (a) Surface topography AFM image of the uniform few-layer-thick ReS<sub>2</sub> film. (b) The line profile of the thickness across the line shown in (a).

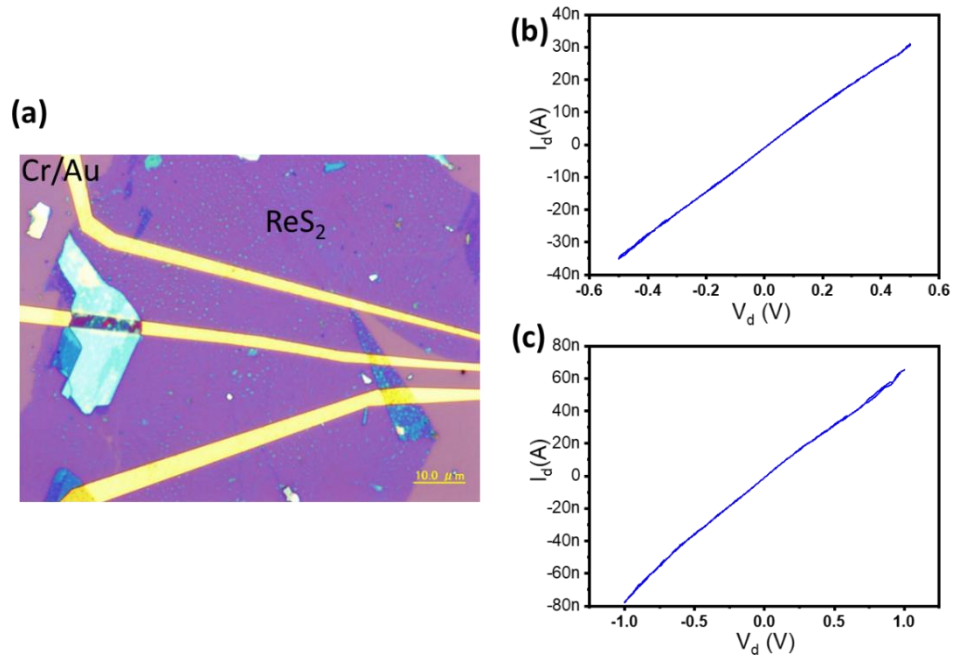

**Figure S3.** (a) Optical image of a large area, thin ReS<sub>2</sub> film was deposited and sintered at 110 °C under vacuum condition for 30 minutes on top of prefabricated Cr/Au electrodes on SiO<sub>2</sub>/Si substrate. (b, c) *I-V* characteristics of the device at two different bias ranges, indicating almost linear *I-V* characteristics of the Au-ReS<sub>2</sub>-Au device structure.

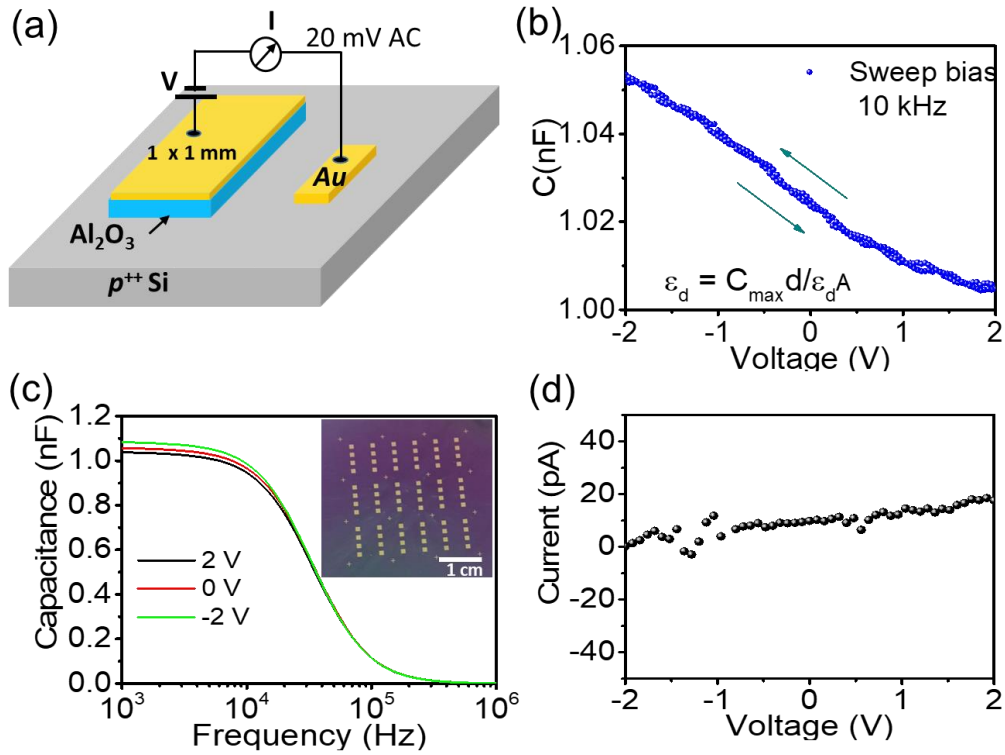

**Figure S4.** (a) Schematic circuit diagram for measuring the *C-V* and *C-f* characteristics. (b) Sweep *C-V* characteristics indicating no hysteresis width for the absence of fixed oxide charges. (c) *C-f*

characteristics at different biases. The inset shows the image of fabricated patterned  $\text{Al}_2\text{O}_3/\text{Cr}/\text{Au}$  squares on top of the  $p^{++}\text{Si}$  substrate. (d)  $I$ - $V$  curve showing negligible leakage current through the  $\text{Al}_2\text{O}_3$  oxide layer.

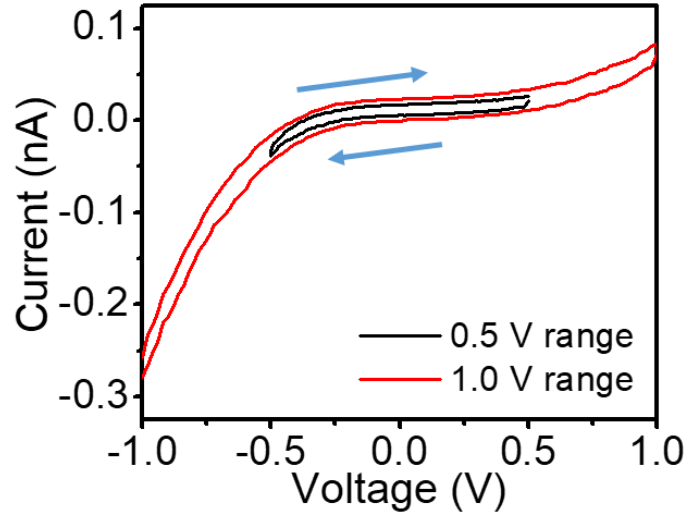

**Figure S5.** Sweep  $I_{\text{DS}}-V_{\text{DS}}$  for different bias ranges showing hysteresis.

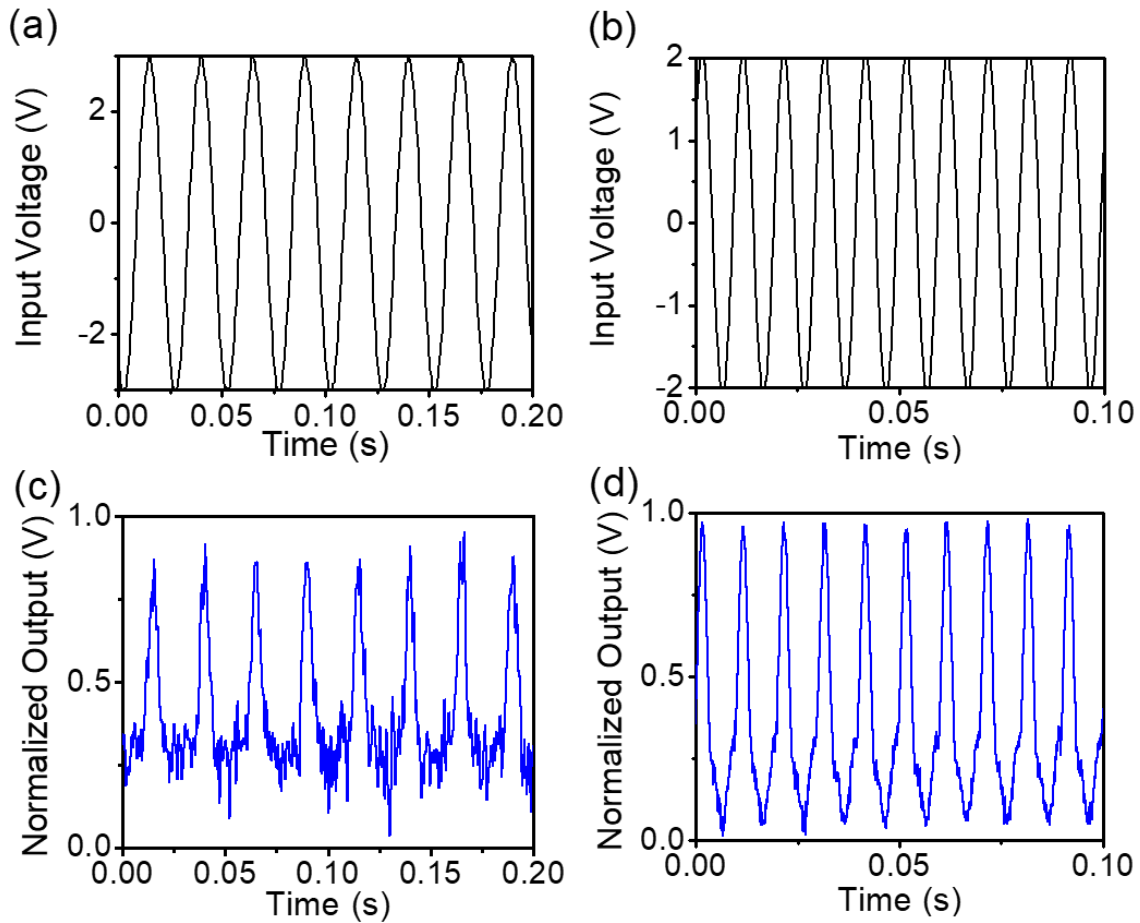

**Figure S6.** Rectification characteristics of the heterojunction diode for (a, b) 40 Hz and (c, d) 100 Hz.

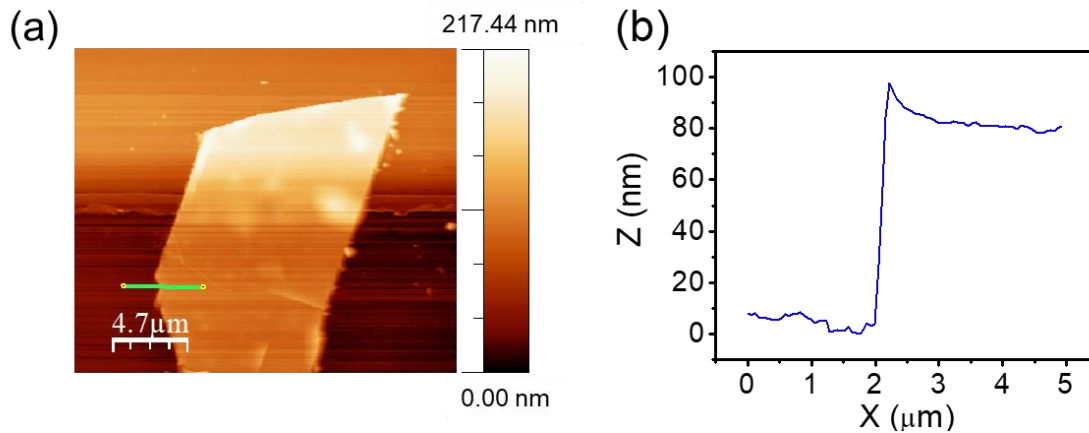

**Figure S7.** (a) Surface topography AFM image of the uniform multilayer-thick ReS<sub>2</sub> film. (b) The line profile of the thickness across the line shown in (a).

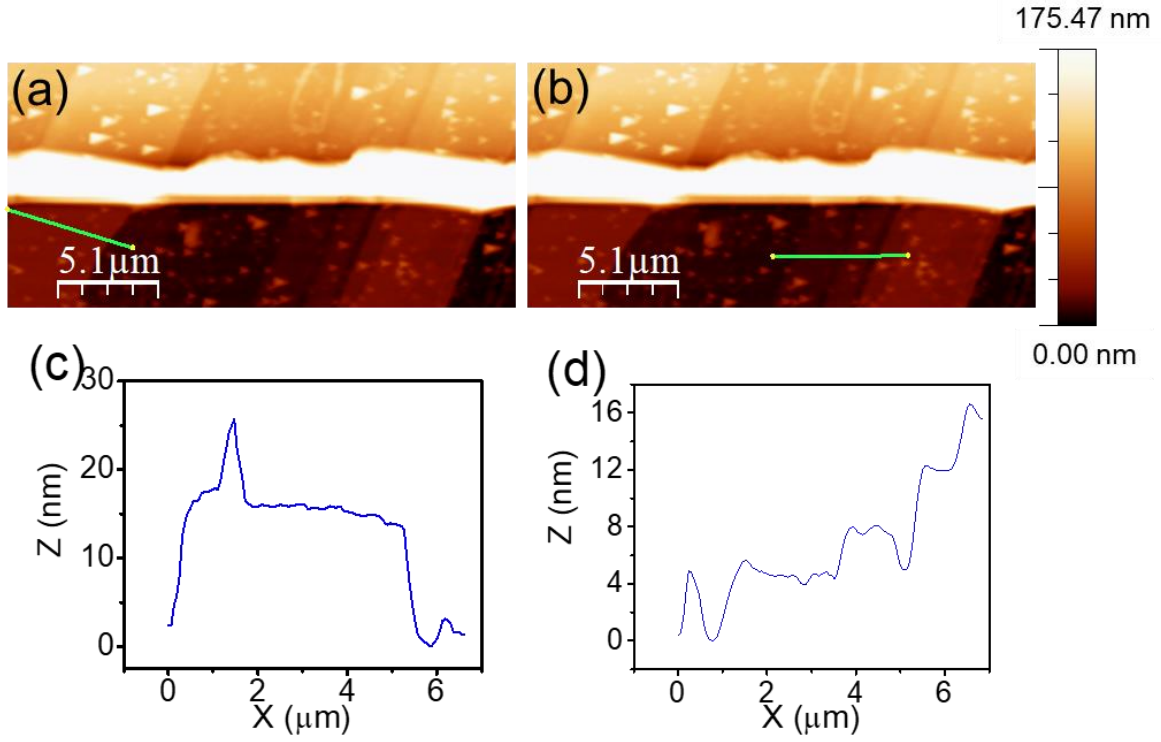

**Figure S8.** (a) Surface topography AFM image of the nonuniform few-layer-thick mixed-thickness ReS<sub>2</sub> film. (b) The line profile of the thickness across the line shown in (a).

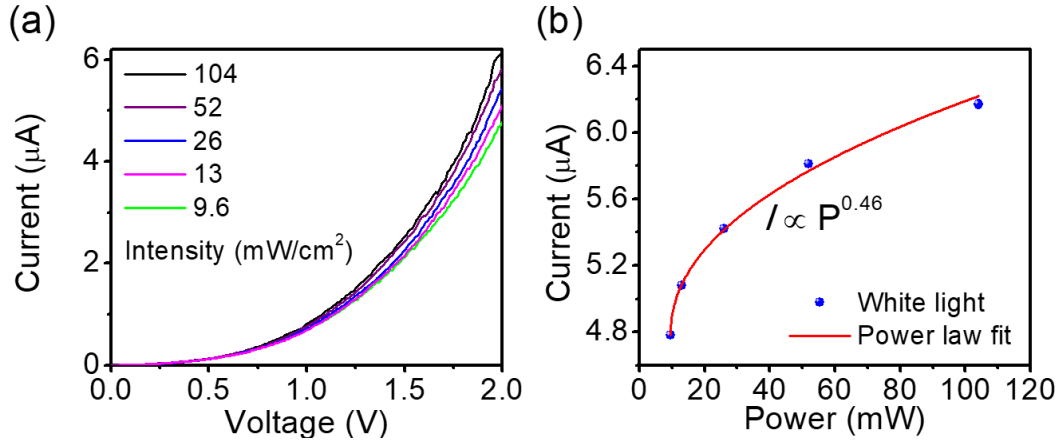

**Figure S9.** (a) Mixed-thickness ReS<sub>2</sub>/Si heterostructure device:  $I$ - $V$  characteristics with different powers under white-light illumination and (b) the power-law dependence at 2 V operation.

| Device Photodiode                         | Wavelength and bias | Photoresponsivity (A/W) | Response time               | Reference             |
|-------------------------------------------|---------------------|-------------------------|-----------------------------|-----------------------|
| Graphene/Si                               | 500 nm, 2 V         | ~0.12                   | -                           | [15]                  |
| Monolayer MoS <sub>2</sub> /Si            | 365 nm, 4 V         | ~0.7                    | -                           | [9]                   |
| Multilayer MoS <sub>2</sub> /Si           | 800 nm, 0 V         | ~0.3                    | ~3 $\mu$ s                  | [11]                  |
| WS <sub>2</sub> /Si                       | 631 nm, 2 V         | ~1.15                   | 42 ms                       | [17]                  |
| Multilayer ReS <sub>2</sub> /Si           | 633 nm, 1 V         | ~0.004                  | 20 $\mu$ s                  | [28]                  |
| <b>Mixed-thickness ReS<sub>2</sub>/Si</b> | <b>532 nm, 3 V</b>  | <b>~33.47</b>           | <b>80 <math>\mu</math>s</b> | <b>Presented work</b> |

**Table S1:** Comparison of the presented work with those reported for 2D-material-based photodiodes.

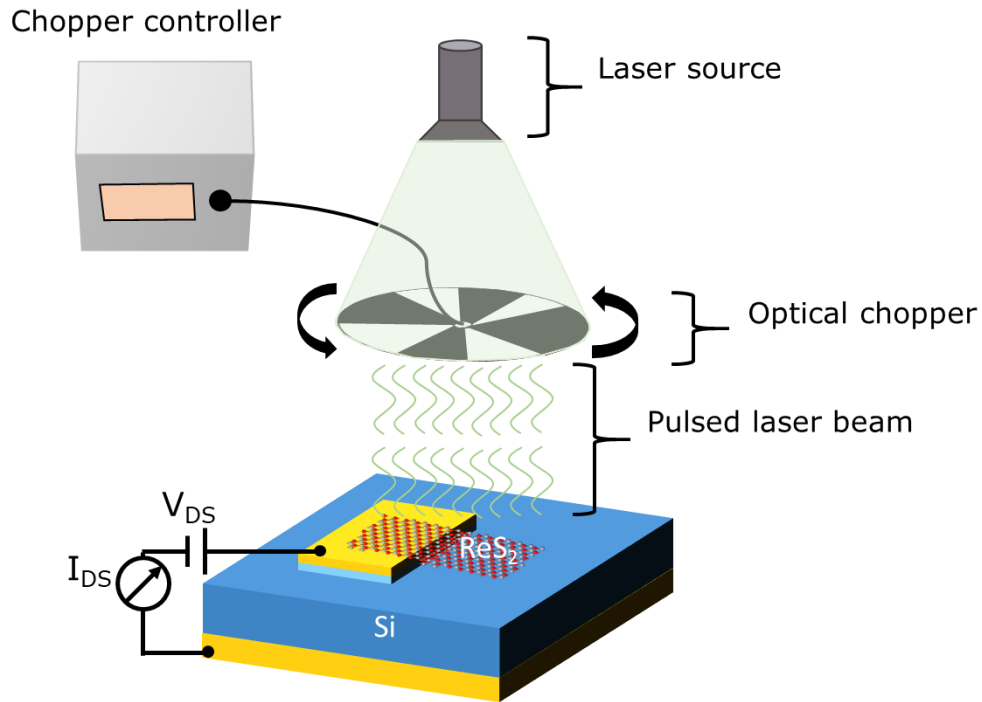

**Figure S10.** Schematic of the pulsed photocurrent–time measurement setup.

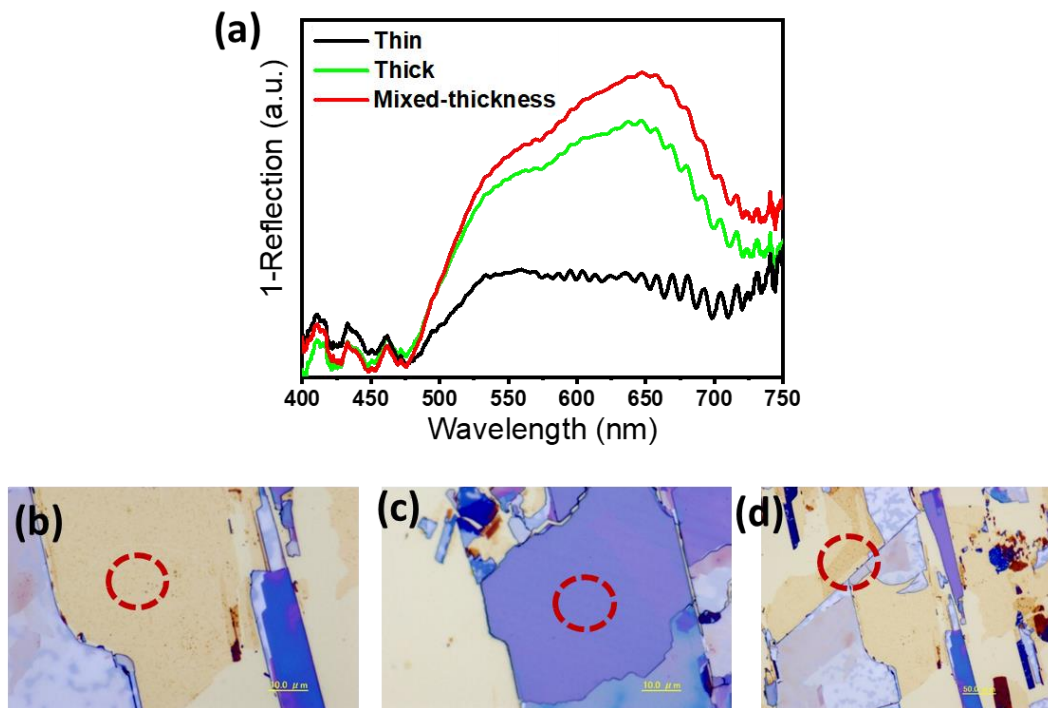

**Figure S11.** (a) Absorption spectra of the ReS<sub>2</sub> sample as shown in the optical images, (b) thin, (c) thick and (d) mixed-thickness on top of Au film coated substrate.
